# Supplementary material for: Synthesis of carboxylic acids via the hydrocarboxylation of alcohols with CO2 and H2
Source: Royal Society of Chemistry journal article supplement (doi:10.1039/d1gc04569e), 2022-01-01
Supplement: d1gc04569e1.pdf [file d1gc04569e1.pdf]

**Electronic Supplementary Information**

**Synthesis of Carboxylic Acids via Hydrocarboxylation of Alcohols with CO<sub>2</sub> and H<sub>2</sub>**

Yanru Zhang, Ying Wang, Qingli Qian, Yang Li, Bernard Baffour Asare Bediako, Jingjing Zhang, Junjuan Yang, Zhiyan Li, Buxing Han

## Experimental

### Chemicals

All chemicals were used as received from suppliers and without further purification. Iridium(III) acetate (>97%, Ir $\geq$ 48.0%) was purchased from Shanghai Haohong Biomedical Technology Co., Ltd. Cyclohexanol (99%+) was provided by Adamas Reagent, Ltd. Iridium (IV) iodide (IrI<sub>4</sub>, 99.95% (metals basis), Ir 27.0%), iridium (III) chloride (IrCl<sub>3</sub>, anhydrous, 99.99% (metals basis)), iridium(IV) oxide dihydrate (IrO<sub>2</sub> · 2H<sub>2</sub>O, 99.99% (metals basis)), iron iodide (FeI<sub>2</sub>, anhydrous, 97% (metals basis)), rhodium (III) iodide (RhI<sub>3</sub>, 99.9%, (metals basis), Rh 20.8% min), ruthenium (III) iodide (RuI<sub>3</sub>, anhydrous, Ru 20.5% min), dihydrogen hexabromoosmate (IV) hydrate (H<sub>2</sub>O<sub>8</sub>Br<sub>6</sub> · xH<sub>2</sub>O, 99.9%, (metals basis)), carbonylchlorobis(triphenylphosphine)iridium (Ir(CO)(PPh<sub>3</sub>)<sub>2</sub>Cl), iridium powder (Ir, -325 mesh, 99.9%, (metals basis)), lithium fluoride (LiF, 99.99%), sodium iodide (NaI, 99.5%), methanesulfonic acid (CH<sub>3</sub>SO<sub>3</sub>H, 98%+) were obtained from Alfa Aesar China Co, Ltd. Lithium iodide (LiI, 99.99%), octane (99%), lithium triflate (98%), n-propanol ( $\geq$ 99.8%), sec-butanol ( $\geq$ 99.8%), tert-butanol (>99.8%), 1,4-butanediol ( $\geq$ 99.5%), 1,3-butanediol (99%), 1-pentanol (99%), 1-hexylalcohol (>99.5%), 1-heptanol (99%), 2-cyclohexylethanol (>98%), glycerol (>99%), n-butanol ( $\geq$ 99.9%), 3-phenylpropanol (99%) and succinic acid (99.5%) were bought from Aladdin. Dicobaltoctacarbonyl (Co<sub>2</sub>(CO)<sub>8</sub>, stabilized with 1-5% hexane), palladium (II) acetate (Pd(OAc)<sub>2</sub>, 98%), lithium chloride (LiCl, 98%), iodocyclohexane (stabilized with copper chip, 98%), cyclopentanol (>99%), methyl iodide (CH<sub>3</sub>I, >99.5%) and cyclohexyl acetate (99%) were bought from TCI Shanghai Co., Ltd. Lithium acetate (99%), iodine (I<sub>2</sub>, 99.8%), iodoform (99%), 1-methyl-2-pyrrolidinone (NMP, 99%), cyclohexene (99%), trifluoroacetic acid (CF<sub>3</sub>COOH, 99%), formic acid (HCOOH, 98%) and phenethyl alcohol (99%) were obtained from J&K Scientific Ltd. Potassium iodide (KI, 99.0%), sulfuric acid (H<sub>2</sub>SO<sub>4</sub>, 95%-98%), propionic acid (CH<sub>3</sub>CH<sub>2</sub>COOH,  $\geq$ 99.5%) were obtained from Sinopharm Chemical Reagent Co., Ltd. Acetic acid (AcOH, 99.8%) was provided by Acros Organics. 1,2-cyclohexanediol was purchased from Ark Pharm. Cyclohexane ( $\geq$ 99.7%) and ethanol (>99.7%) were bought from kangkede Tianjin Co., Ltd. Dimethyl sulfoxide (DMSO, A.R.) was provided by Beijing Chemical works. Isopropanol ( $\geq$ 99.7%) was offered by Xi Long scientific Technology Co. Ltd. CO<sub>2</sub> (99.99%), H<sub>2</sub> (99.99%) and CO (99.99%) were provided by Beijing Analytical Instrument Company. Deuterium gas (D<sub>2</sub>, 99.999%) was offered by Zhengzhou Xingdao Chemical Technology Co. Ltd. Carbon dioxide-<sup>13</sup>C (<sup>13</sup>CO<sub>2</sub>, 99% <sup>13</sup>C) was obtained from Beijing Gaisi Chemical Gases Center. Lithium bromide (LiBr, 99%), deuterated dimethyl sulfoxide-d<sub>6</sub> (99.8 atom % D, with 0.03%(V/V) TMS), D<sub>2</sub>O (99.9 atom % D) and H<sub>2</sub><sup>18</sup>O (97 atom % <sup>18</sup>O) were purchased from Beijing InnoChem Science & Technology Co., Ltd.

### Catalytic reaction

The reaction was conducted in a 16 mL Teflon-lined stainless steel batch reactor with 18 mm inner diameter, and the reactor was equipped with a magnetic stirrer. In a typical experiment, the desired amount of Iridium acetate as catalyst, LiI as promoter, cyclohexanol as substrate and AcOH as solvent were sequentially added into the reactor. The reactor was sealed and purged twice with 1 MPa of CO<sub>2</sub>, then CO<sub>2</sub> and H<sub>2</sub> of desired pressure at room temperature were charged sequentially into the reactor. The reactor was heated to and kept at a specified temperature during the reaction, and the stirrer rotated at 800 rpm. When the reaction was finished the reactor was put into an ice-water bath to cool down. After cooling completely, the residual gas in the reactor was released slowly and collected in a gas bag. The products and intermediates of the reaction were identified by GC-MS (SHIMADZU GCMS-QP2010) using Rtx-WAX column (length = 30 m, diameter = 0.32 mm, film = 0.25  $\mu$ m) as well as comparing the retention time with the respective standard in the LC or GC traces. The gaseous samples were analyzed and quantified by a gas chromatograph (Agilent 7890B) equipped with a packed column (carbon

molecular sieve TDX-01, 3 mm in diameter and 1 m in length) and a TCD detector using argon as carrier gas. The amount of carboxylic acid in the reaction solution was determined by a liquid chromatograph (LC-10AT, SHIMADZU) equipped with a BP-800 H+ carbohydrate column (S/N 23757, Benson polymeric) and a refractive index detector (RID). The column temperature was maintained at 323.15 K. The column was eluted with 5 mmol/L H<sub>2</sub>SO<sub>4</sub> solution at a flow rate of 0.4 mL/min or 0.8 mL/min according to the product analyzed. Before the LC analysis, the liquid mixture after the reaction was diluted with 10 mL 1/1 AcOH/H<sub>2</sub>O, followed by addition of 10 μL DMSO or succinic acid as internal standard. An aliquot of this sample was filtered through syringe filters with hydrophilic PTFE membrane, and the filtrate was immediately injected into the chromatograph. The liquid intermediates in the reaction solution were quantified by a gas chromatograph (GC, Agilent 7890B) equipped with a flame ionization detector (FID) and an HP-INNOWAX capillary column (length = 30 m, diameter = 0.25 mm, film = 0.25 μm). Before this analysis, the liquid solution was diluted with 5 mL acetone, followed by addition of 15 μL octane as internal standard. Liquid <sup>13</sup>C NMR spectra were recorded on Bruker Avance III 400 HD NMR spectrometer. NMR chemical shifts δ are given in parts per million (ppm) relative to tetramethylsilane. Infrared Radiation (IR) spectroscopy was recorded on Bruker Tensor-27 FT-IR Spectrometer. High-resolution electrospray ionization mass spectrometry (HR-ESI-MS) was recorded on Bruker FT-ICR-MS (Solarix 9.4T).

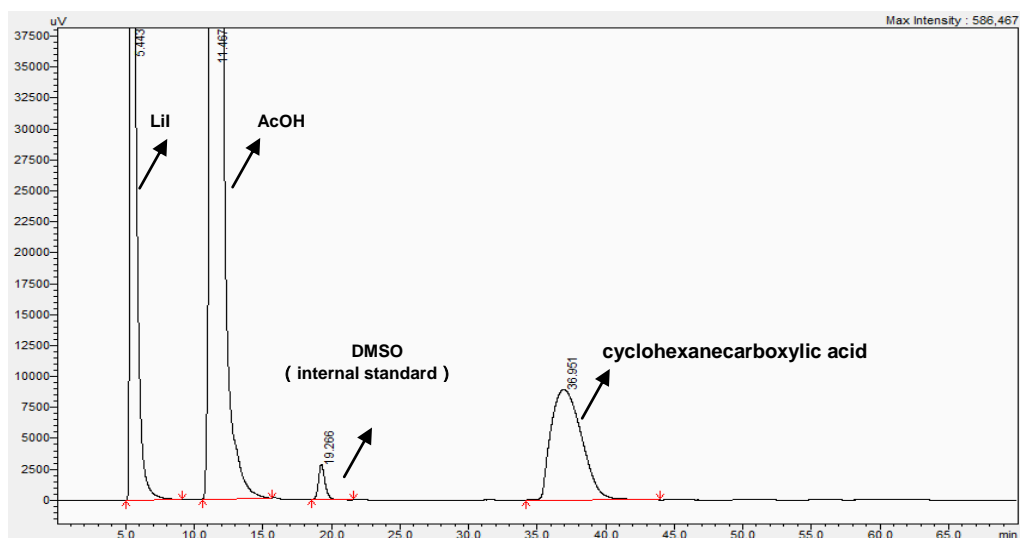

**Fig. S1** The LC graph of the reaction liquid. Reaction conditions: 45  $\mu\text{mol}$  iridium(III) acetate (based on Ir), 2 mmol LiI, 0.5 mL AcOH, 2.25 mmol cyclohexanol, 6 MPa (68 mmol)  $\text{CO}_2$  and 1 MPa  $\text{H}_2$  (at room temperature), 16 h, 170  $^\circ\text{C}$ .

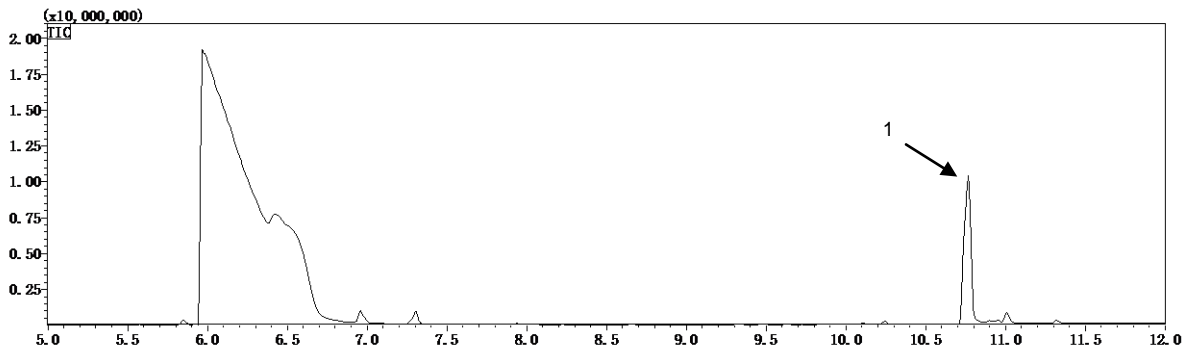

Peak 1

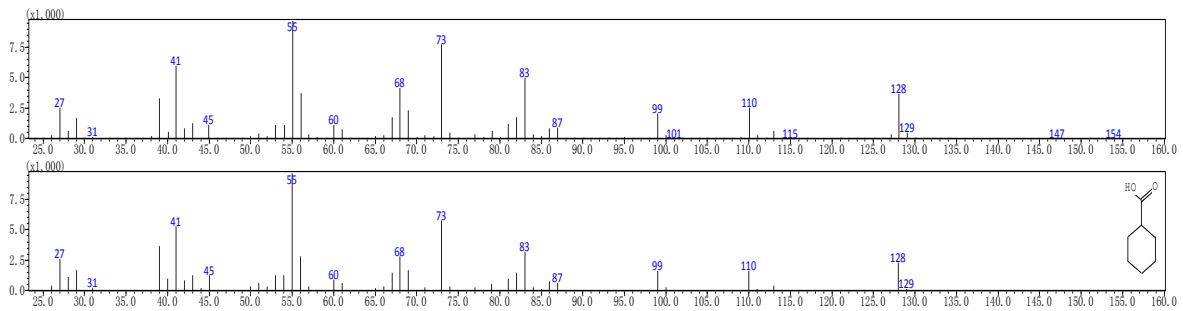

Fig. S2 The GC-MS graph of the liquid sample using cyclohexanol as substrate.

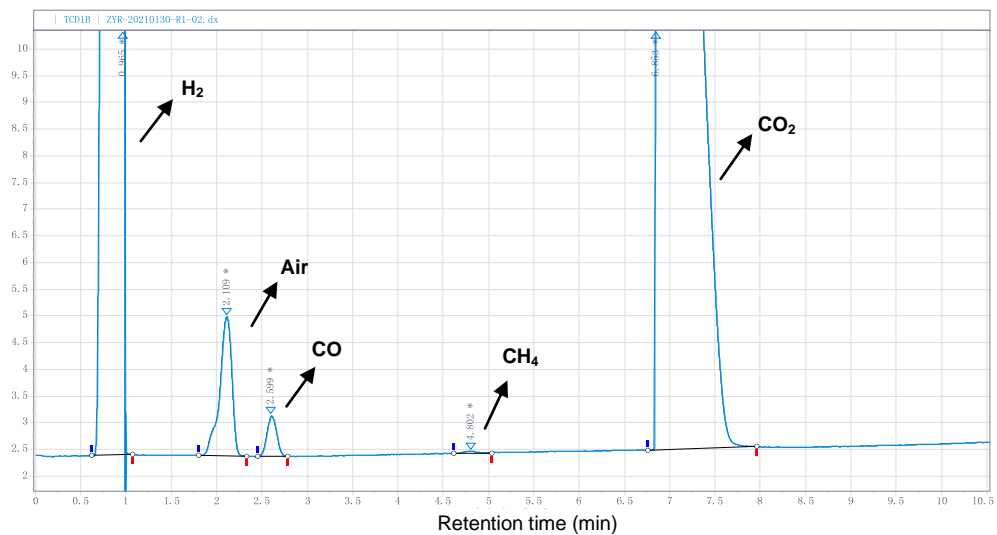

**Fig. S3** The GC graph of gaseous sample after the reaction. Reaction conditions: 45  $\mu\text{mol}$  iridium(III) acetate (based on Ir), 2 mmol LiI, 0.5 mL AcOH, 2.25 mmol cyclohexanol, 6 MPa (68 mmol)  $\text{CO}_2$  and 1 MPa  $\text{H}_2$  (at room temperature), 1 h, 170  $^\circ\text{C}$ .

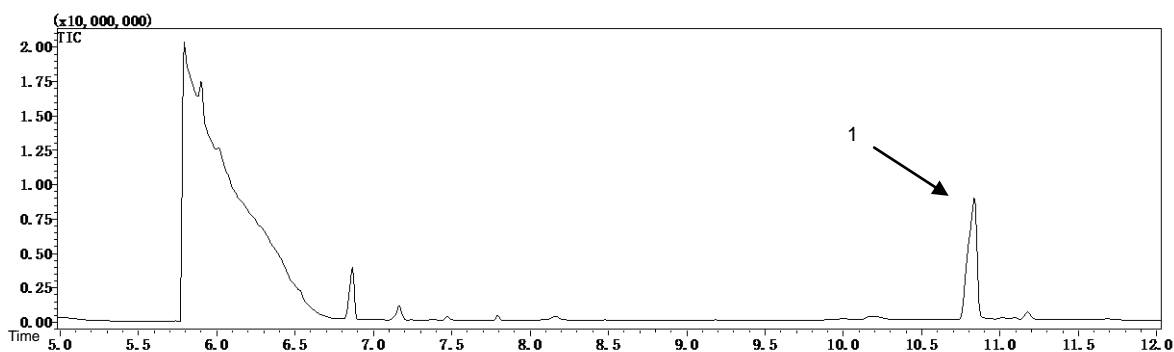

Peak 1

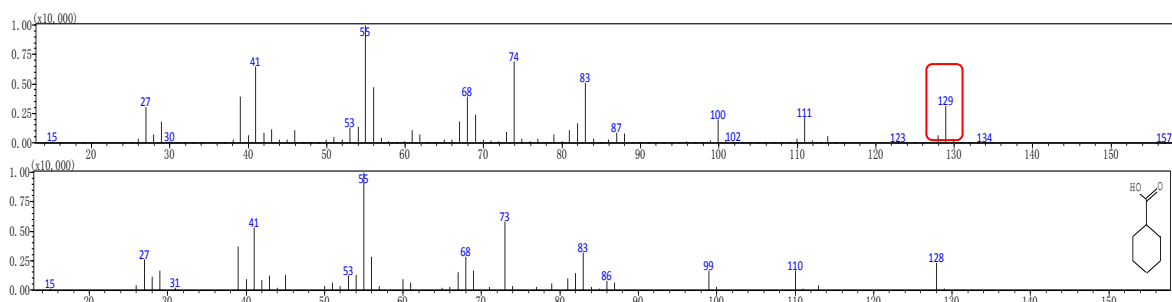

**Fig. S4** The GC-MS graph of the liquid sample after the  $^{13}\text{C}$   $\text{CO}_2$  labelling test. Reaction conditions: 45  $\mu\text{mol}$  iridium(III) acetate (based on Ir), 2 mmol LiI, 0.5 mL AcOH, 2.25 mmol cyclohexanol, 1.5 MPa  $^{13}\text{C}$   $\text{CO}_2$  and 1 MPa  $\text{H}_2$  (at room temperature), 16 h, 170  $^\circ\text{C}$ .

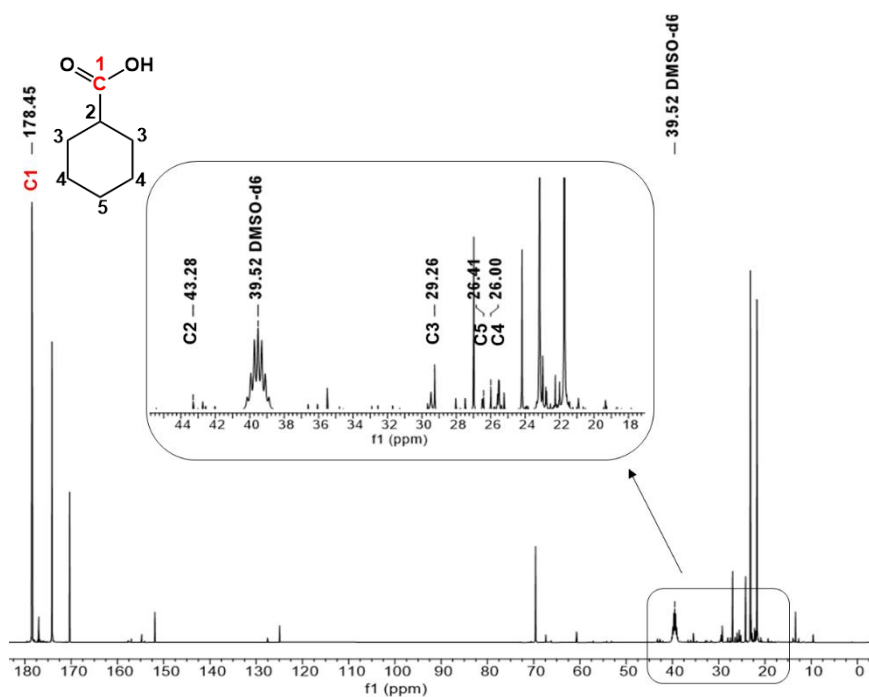

**Fig. S5** The  $^{13}\text{C}$  NMR spectra of the  $^{13}\text{C}$   $\text{CO}_2$  labelling experiment. Reaction conditions: 45  $\mu\text{mol}$  iridium(III) acetate (based on Ir), 2 mmol LiI, 0.5 mL AcOH, 2.25 mmol cyclohexanol, 1.5 MPa  $^{13}\text{C}$   $\text{CO}_2$  and 1 MPa  $\text{H}_2$  (at room temperature), 16 h, 170  $^\circ\text{C}$ . The peaks of C2, C3, C5, and C4 ( $\delta$  43.28 ppm, 29.26 ppm, 26.41 ppm, 26.00 ppm) belong to alkyl carbons of cyclohexanecarboxylic acid. The peak of C1 is attributed to the carbon of the carboxyl groups of the cyclohexanecarboxylic acid, which is remarkably larger than those of the alkyl carbons of the product. It indicated that  $\text{CO}_2$  took part in forming the carboxyl group of the product.

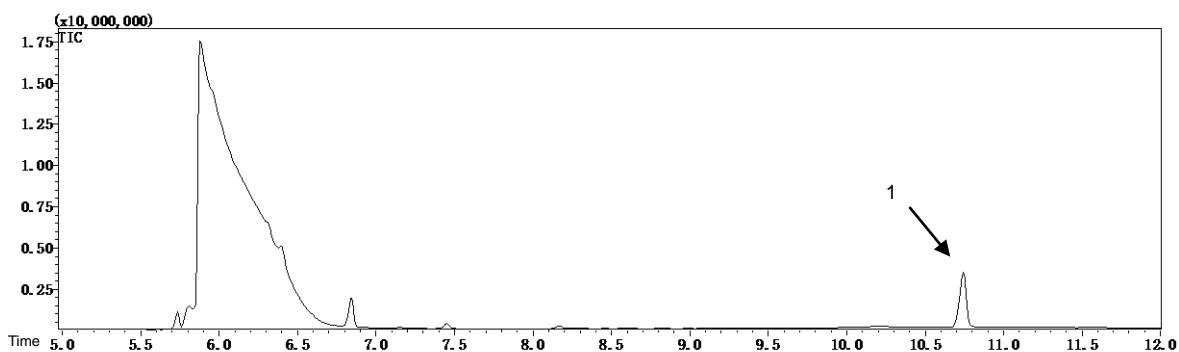

Peak 1

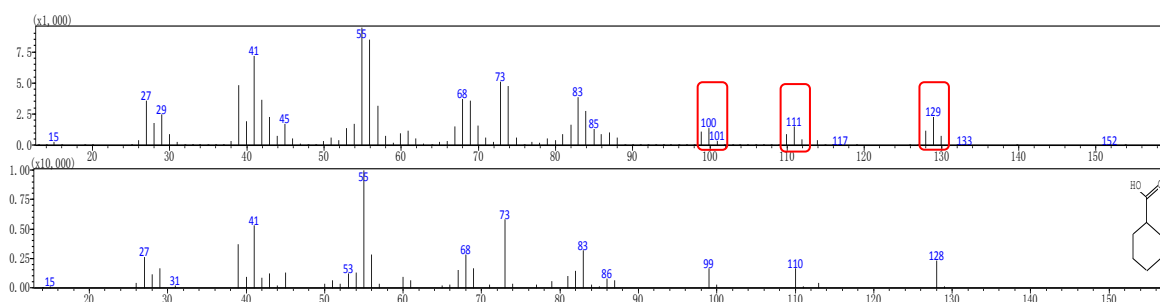

**Fig. S6** The GC-MS graph of the liquid sample after the D<sub>2</sub>O labelling test. Reaction conditions: 45  $\mu$ mol iridium(III) acetate (based on Ir), 2 mmol LiI, 0.5 mL AcOH, 0.2 mL D<sub>2</sub>O, 2.25 mmol cyclohexanol, 6 MPa (68 mmol) CO<sub>2</sub> and 1 MPa H<sub>2</sub> (at room temperature), 16 h, 170 °C.

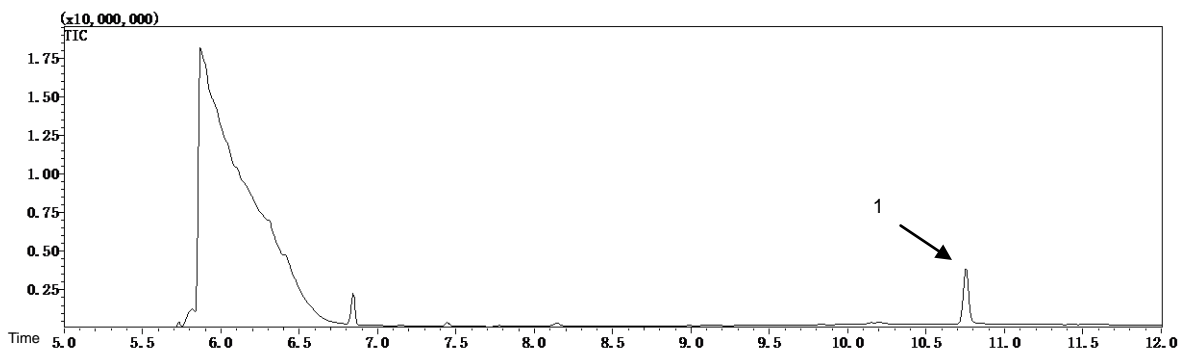

Peak 1

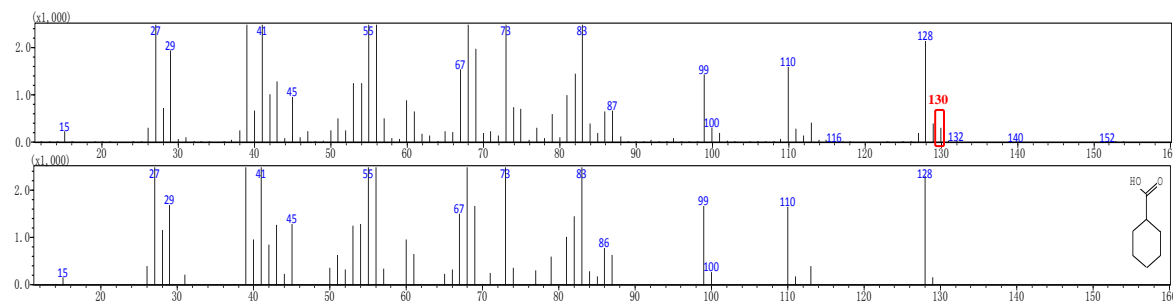

**Fig. S7** The GC-MS graph of the liquid sample after the H<sub>2</sub><sup>18</sup>O labelling test. Reaction conditions: 45  $\mu$ mol iridium(III) acetate (based on Ir), 2 mmol LiI and 0.5 mL AcOH, 0.2 mL H<sub>2</sub><sup>18</sup>O, 2.25 mmol cyclohexanol, 6 MPa (68 mmol) CO<sub>2</sub> and 1 MPa H<sub>2</sub> (at room temperature), 16 h, 170 °C.



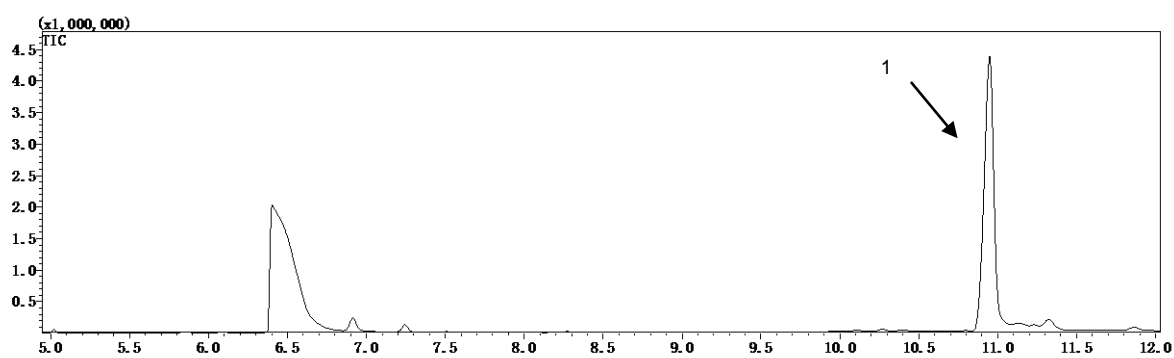

Peak 1

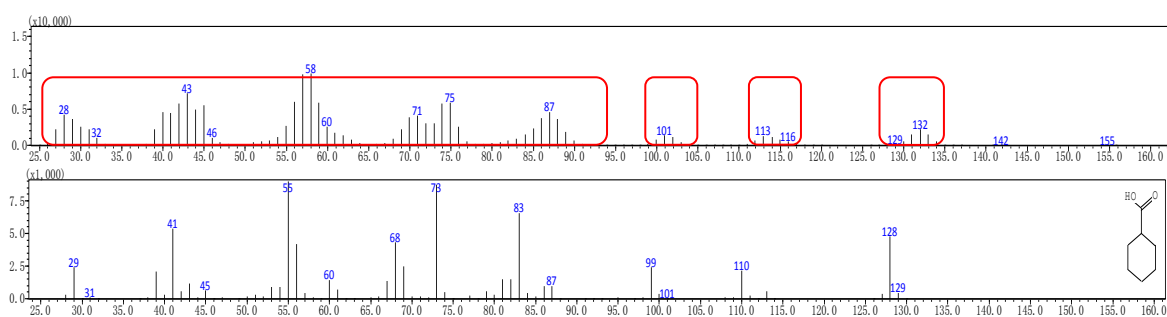

**Fig. S8** The GC-MS graph of the liquid sample after the D<sub>2</sub> labelling test. Reaction conditions: 45  $\mu$ mol iridium(III) acetate (based on Ir), 2 mmol LiI, 0.5 mL AcOH, 2.25 mmol cyclohexanol, 6 MPa (68 mmol) CO<sub>2</sub> and 1 MPa D<sub>2</sub> (at room temperature), 16 h, 170 °C.

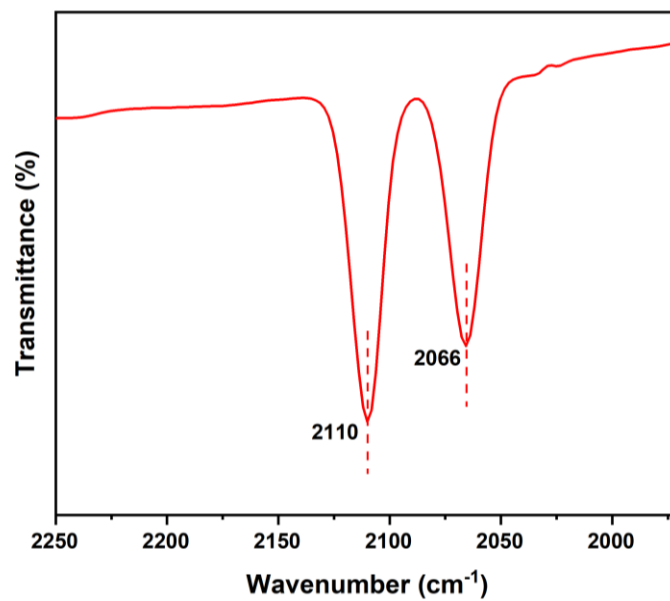

**Fig. S9** FTIR spectra of reaction liquid. Reaction conditions: 45  $\mu\text{mol}$  iridium(III) acetate (based on Ir), 2 mmol LiI and 0.5 mL AcOH, 2.25 mmol cyclohexanol, 6.0 MPa (68 mmol)  $\text{CO}_2$  and 1 MPa  $\text{H}_2$  (at room temperature), 16 h, 170  $^\circ\text{C}$ . (The peaks at  $\nu = 2110 \text{ cm}^{-1}$  and  $\nu = 2066 \text{ cm}^{-1}$  are attributed to  $\nu(\text{CO})$  of  $\text{cis-}[\text{Ir}(\text{CO})_2\text{I}_4]^-$  species)<sup>1</sup>.

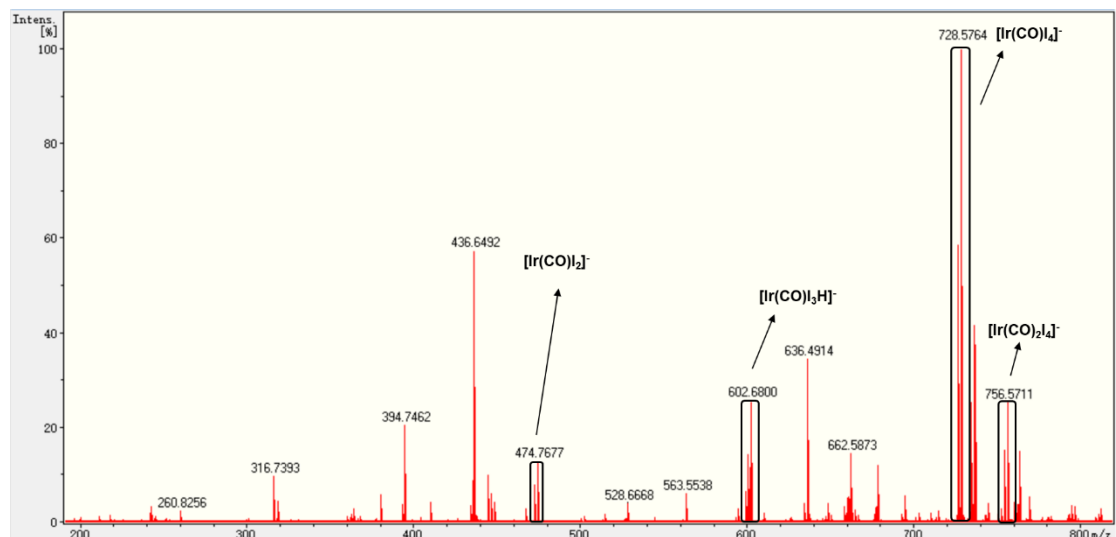

**Fig. S10** The HR-ESI(-)-MS result of the reaction liquid. Reaction conditions: 45  $\mu\text{mol}$  iridium(III) acetate (based on Ir), 2 mmol LiI and 0.5 mL AcOH, 2.25 mmol cyclohexanol, 6.0 MPa (68 mmol)  $\text{CO}_2$  and 1 MPa  $\text{H}_2$  (at room temperature), 16 h, 170  $^\circ\text{C}$ . The spectra of detected Ir species are in good agreement with their calculated isotope distribution spectra.

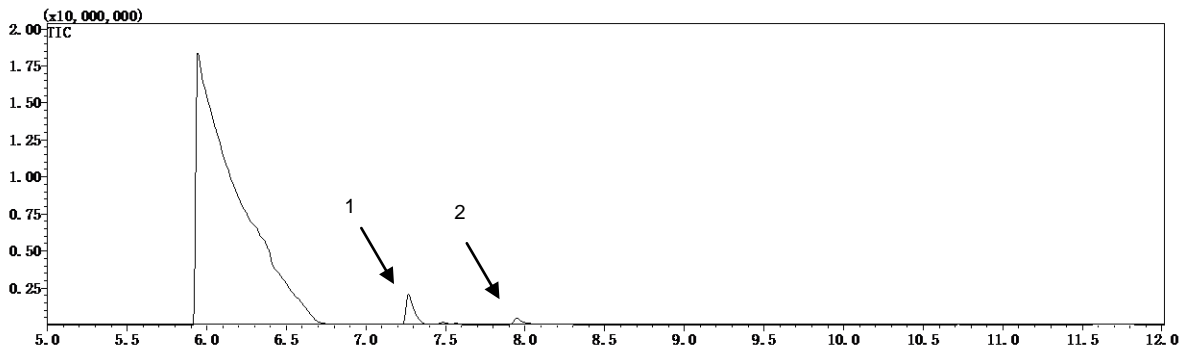

**Peak 1**

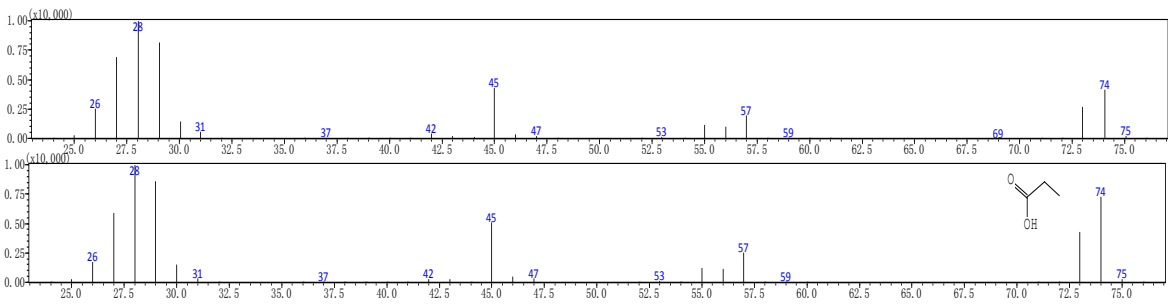

**Peak 2**

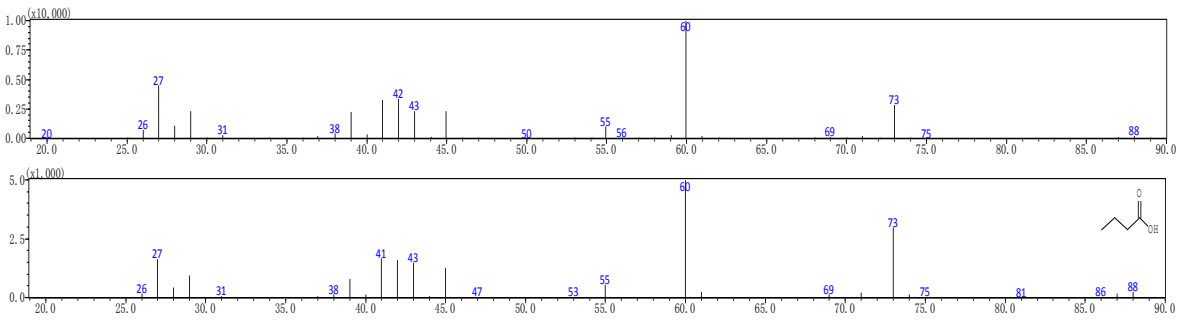

**Fig. S11** The GC-MS graph of the liquid sample using ethanol as substrate.

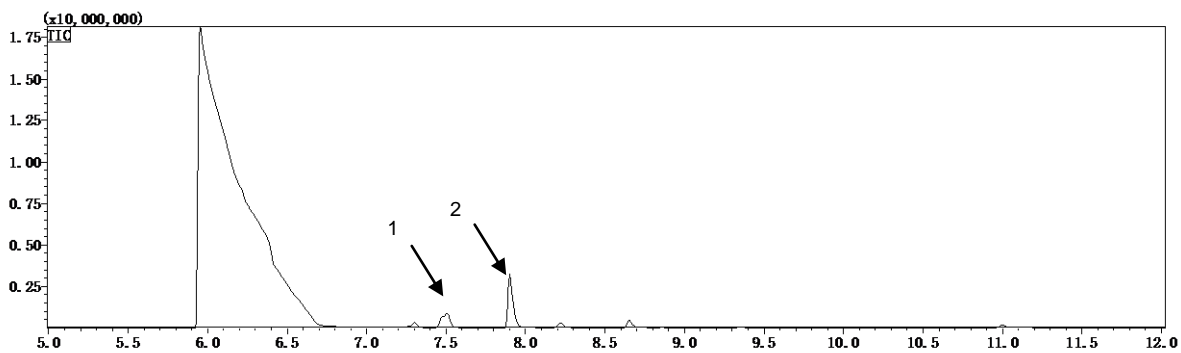

Peak 1

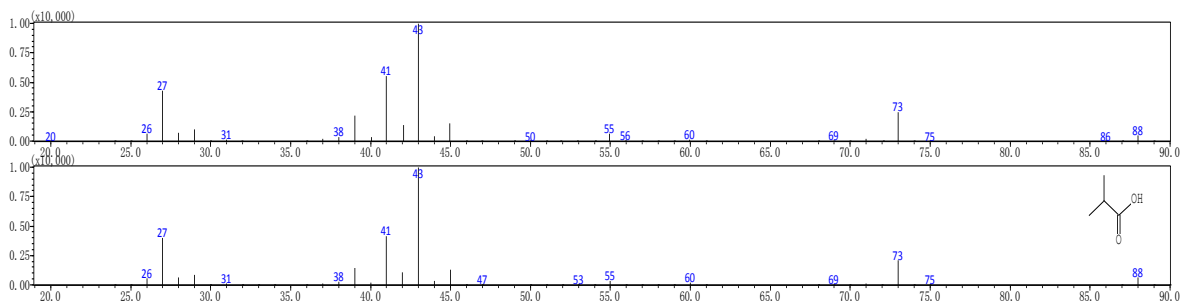

Peak 2

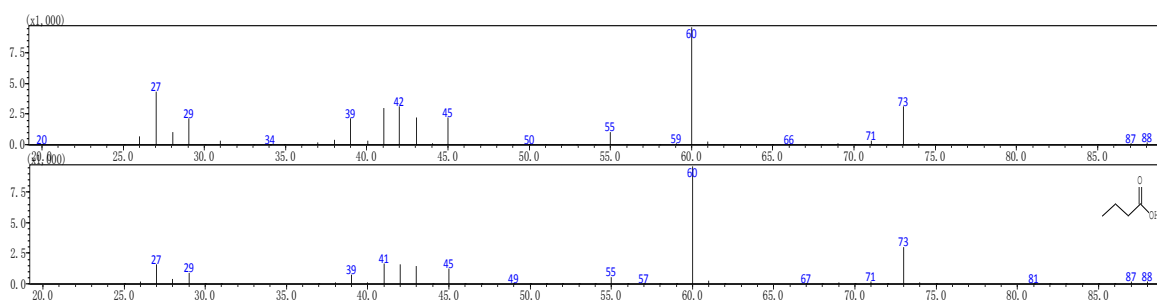

Fig. S12 The GC-MS graph of the liquid sample using 1-propanol as substrate.

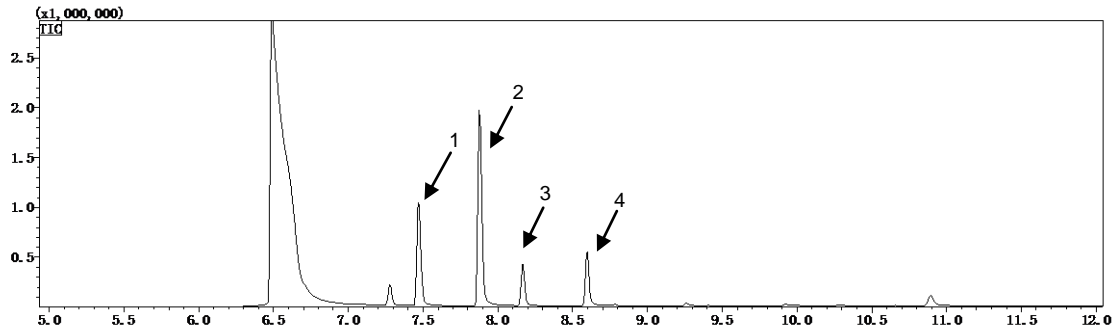

Peak 1

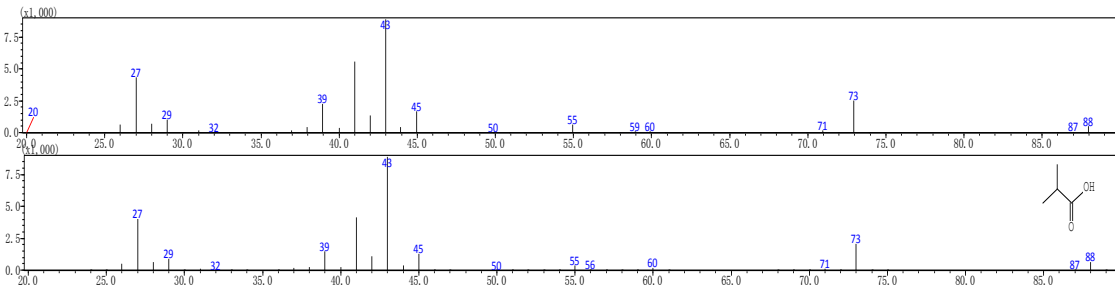

Peak 2

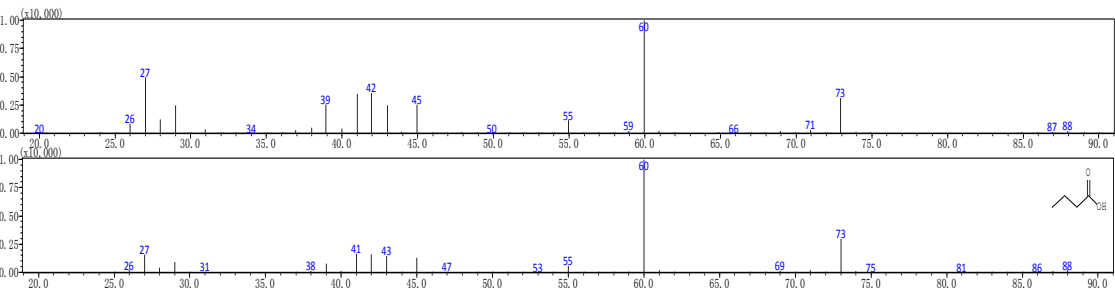

Peak 3

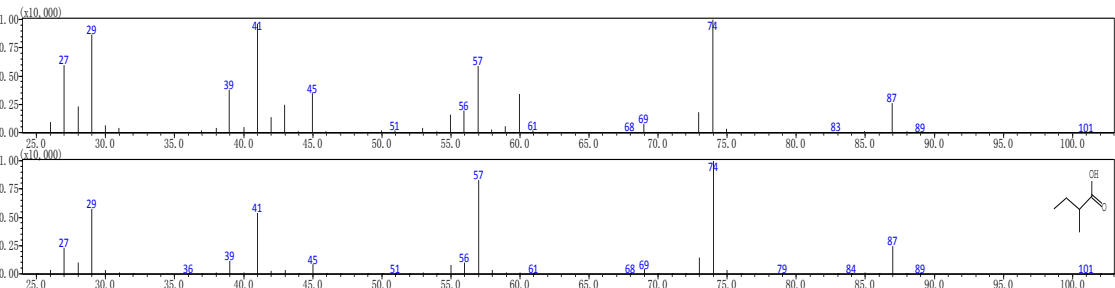

Peak 4

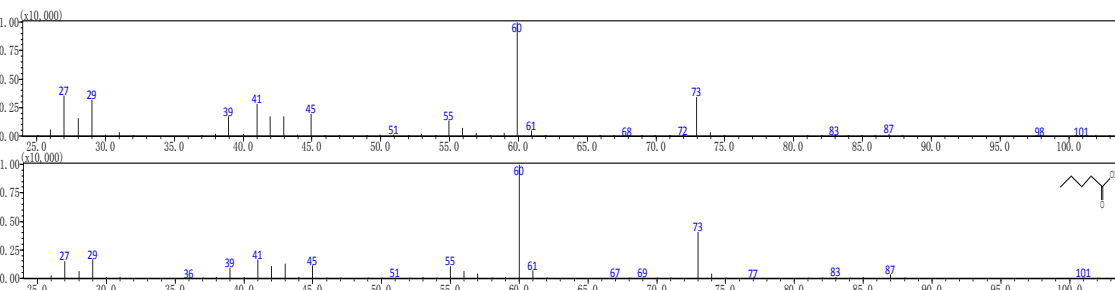

Fig. S13 The GC-MS graph of the liquid sample using isopropanol as substrate.

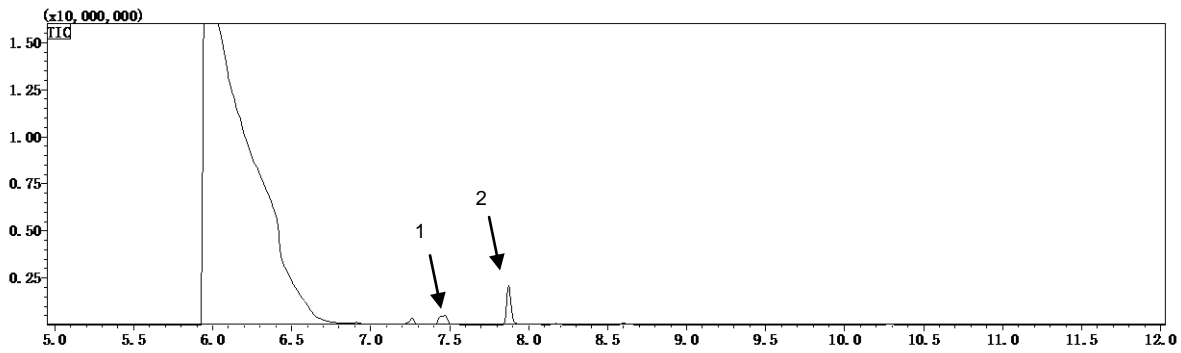

Peak 1

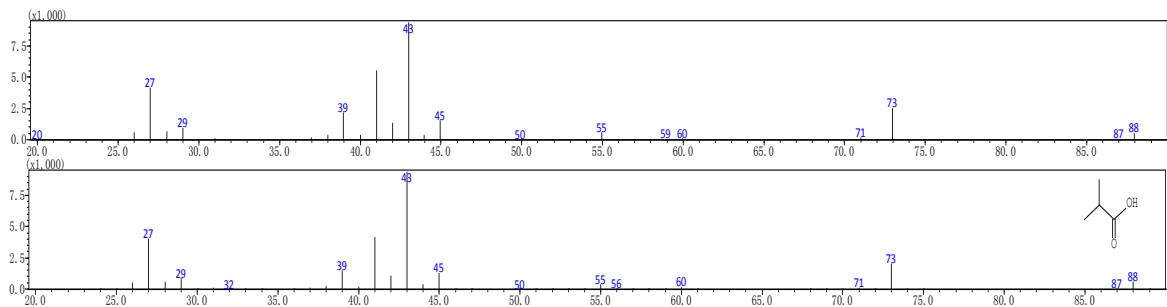

Peak 2

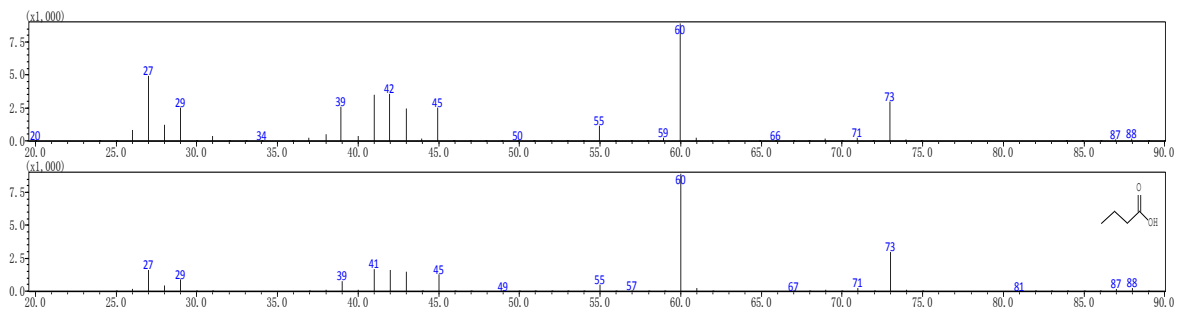

Fig. S14 The GC-MS graph of the liquid sample using glycerol as substrate.

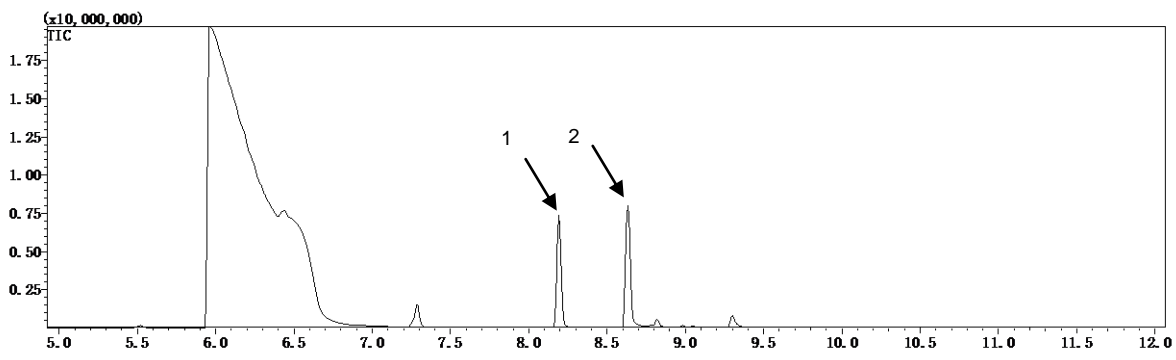

Peak 1

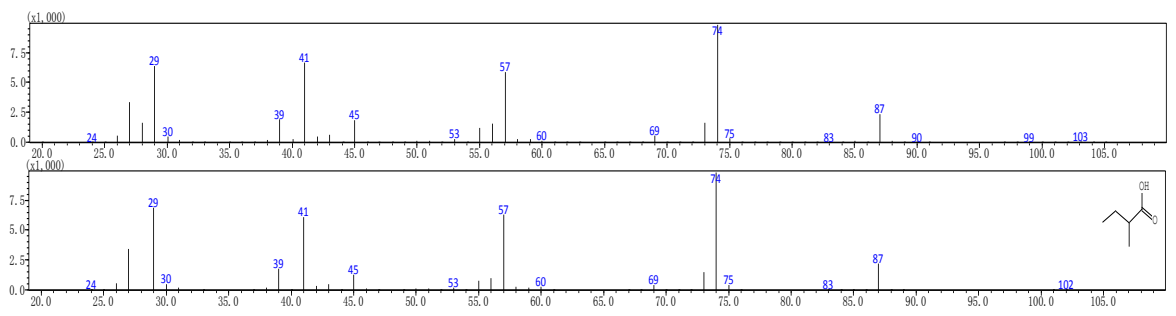

Peak 2

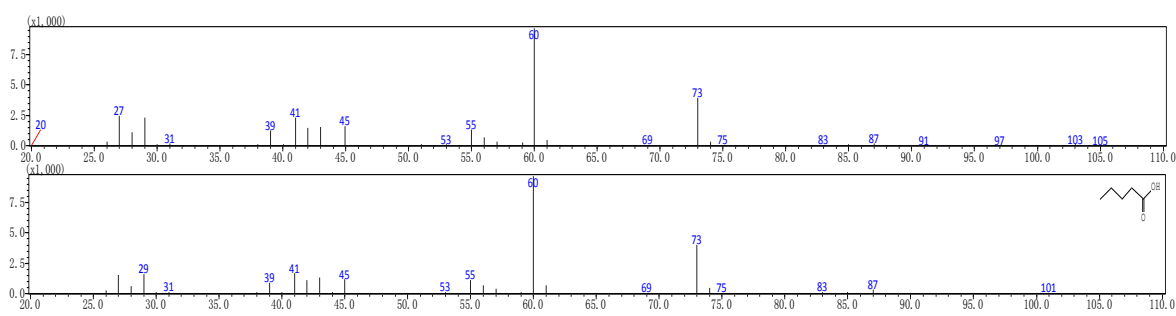

Fig. S15 The GC-MS graph of the liquid sample using 1-butanol as substrate.



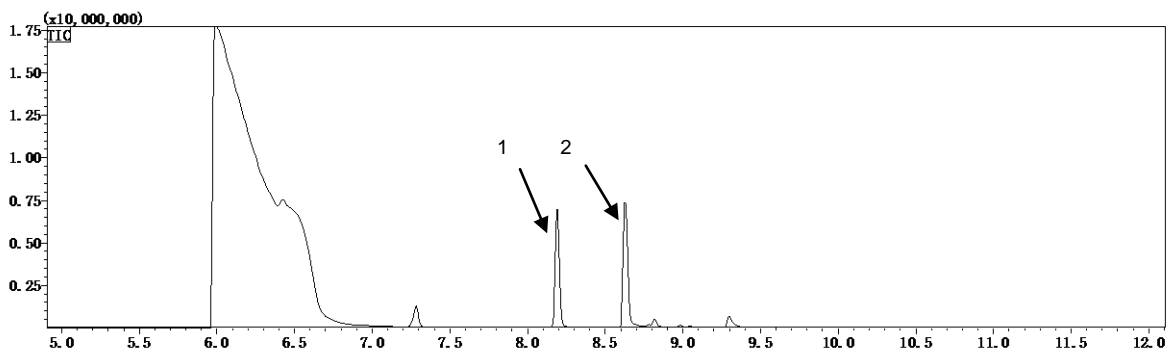

Peak 1

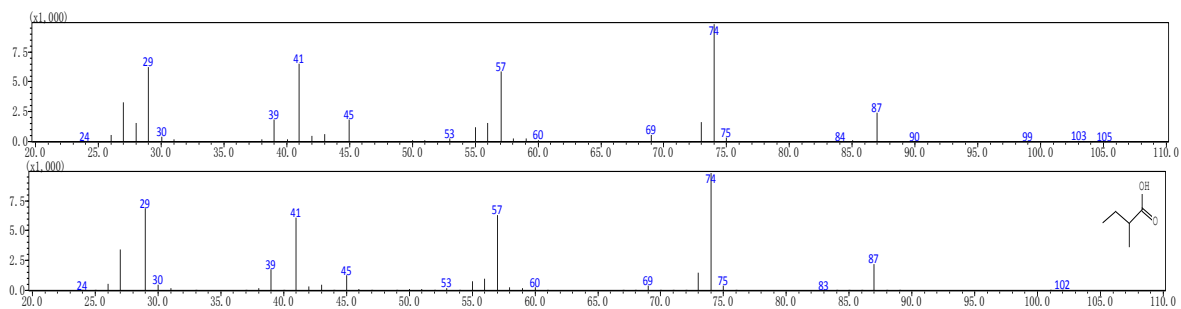

Peak 2

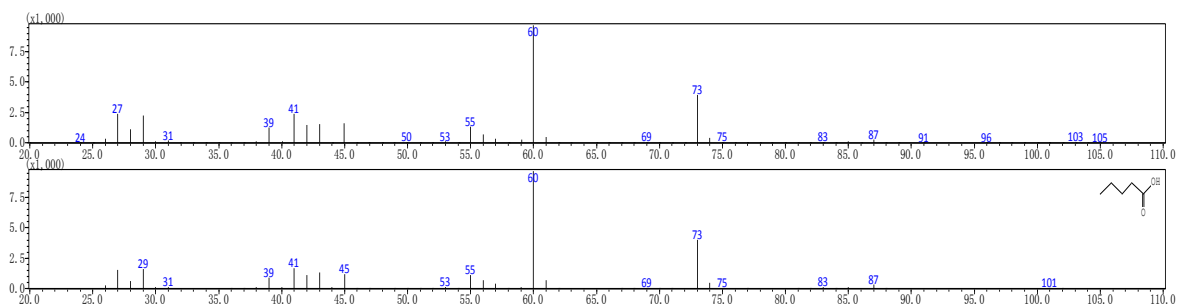

Fig. S16 The GC-MS graph of the liquid sample using sec-butanol as substrate.

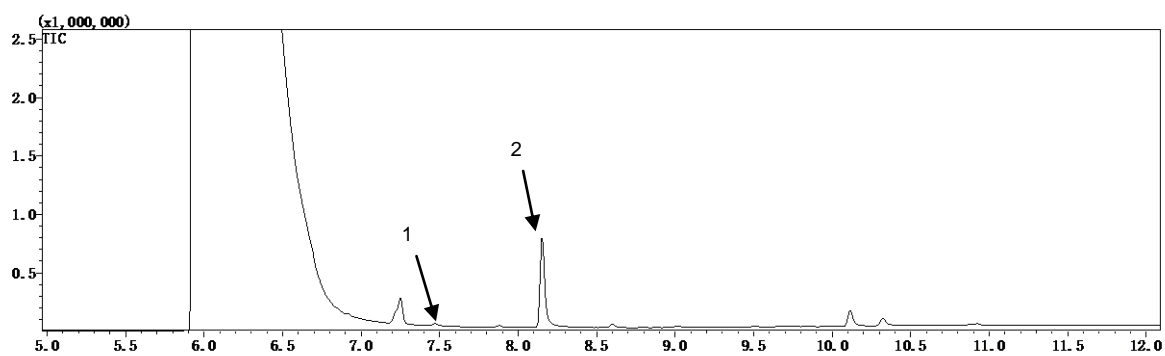

Peak 1

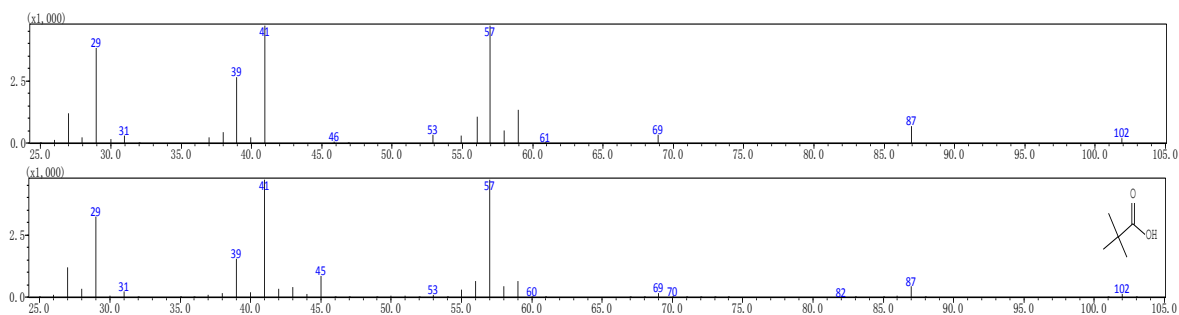

Peak 2

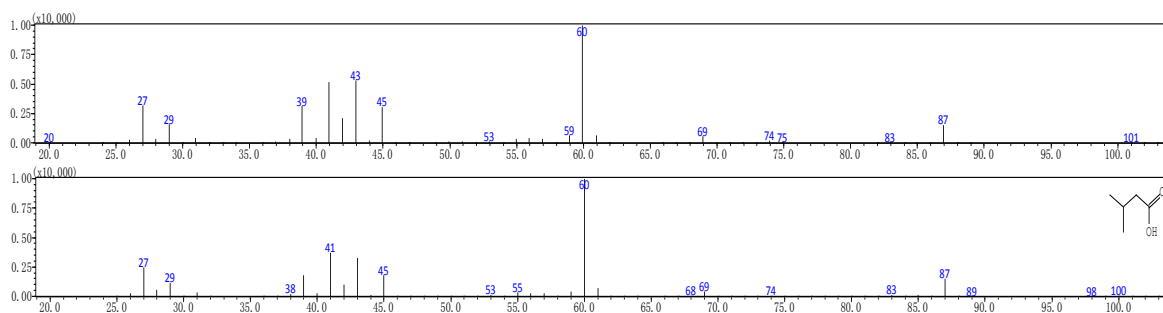

Fig. S17 The GC-MS graph of the liquid sample using tert-butanol as substrate.

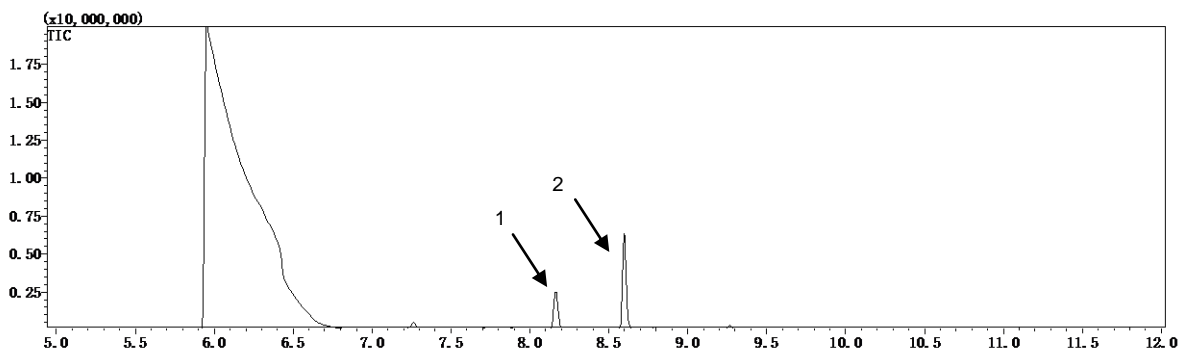

Peak 1

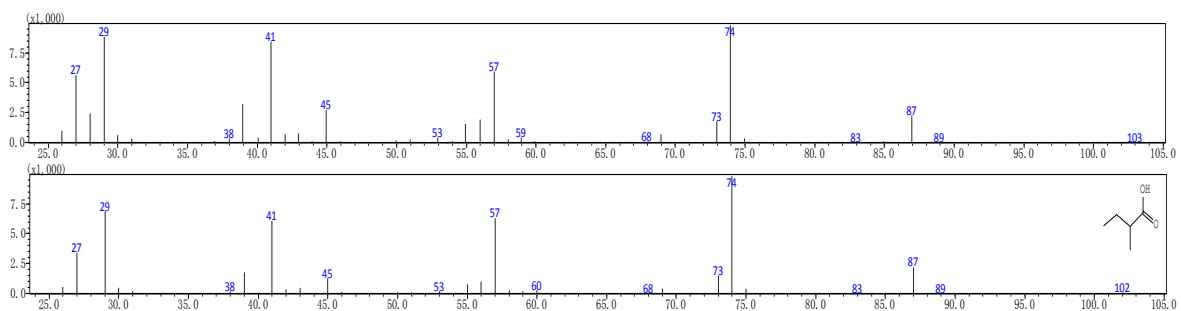

Peak 2

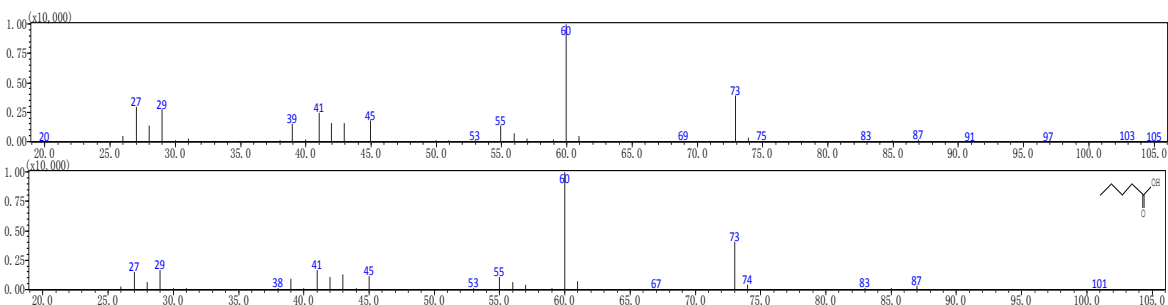

Fig. S18 The GC-MS graph of the liquid sample using 1,4-butanediol as substrate.

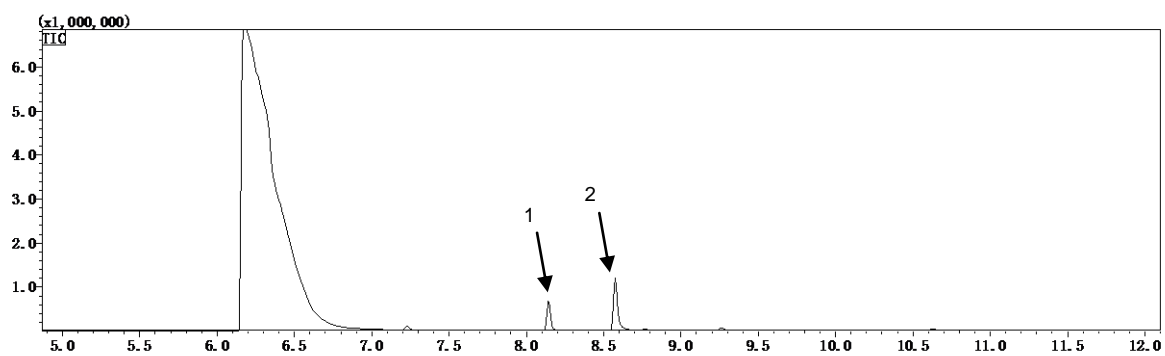

Peak 1

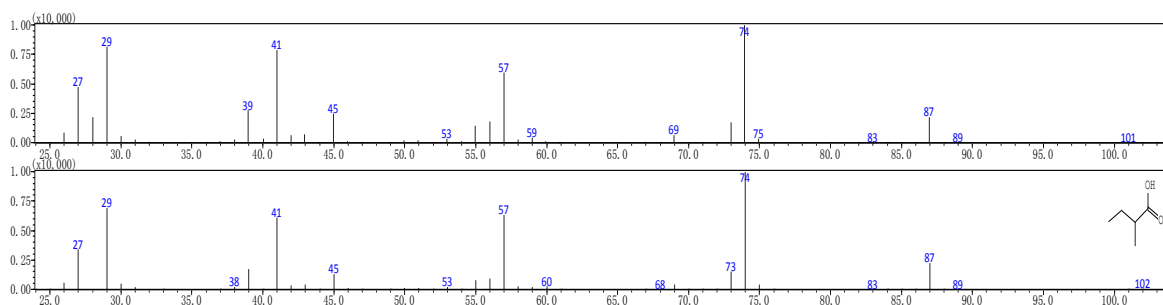

Peak 2

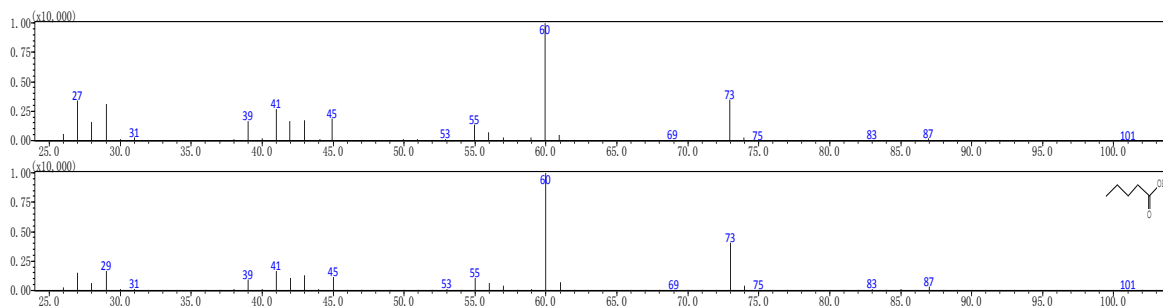

Fig. S19 The GC-MS graph of the liquid sample using 1,3-butanediol as substrate.

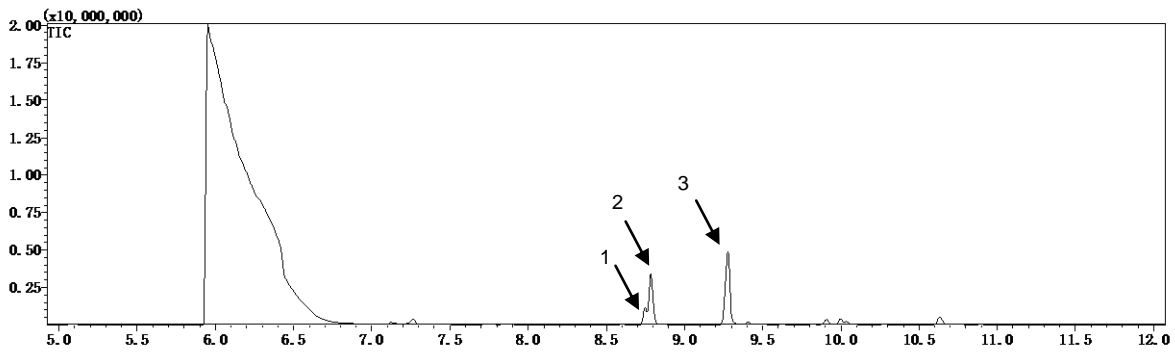

Peak 1

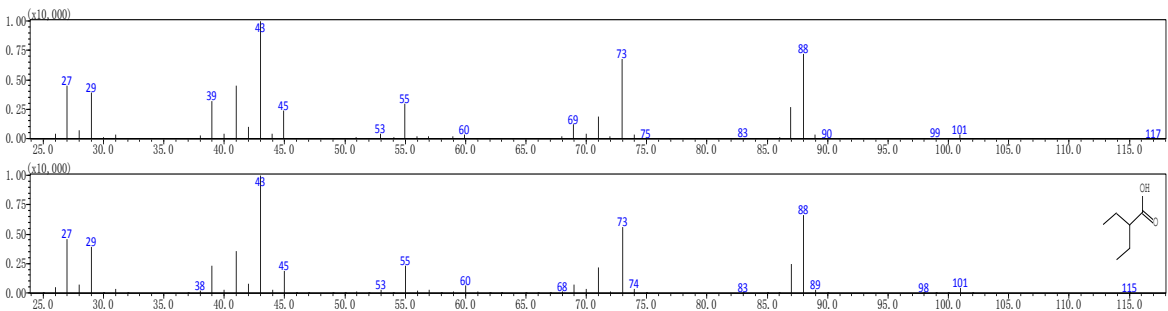

Peak 2

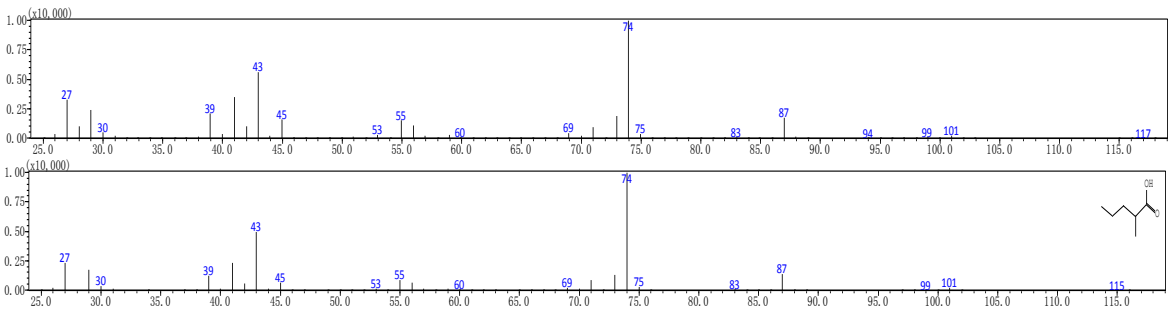

Peak 3

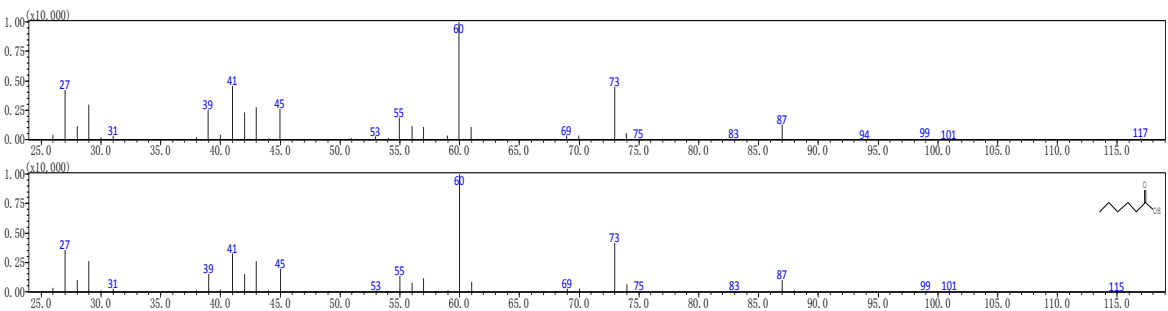

Fig. S20 The GC-MS graph of the liquid sample using 1-pentanol as substrate.

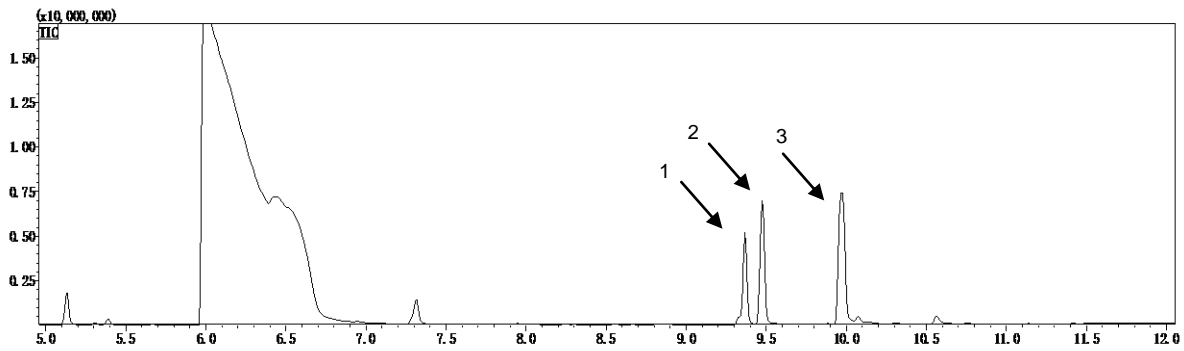

**Peak 1**

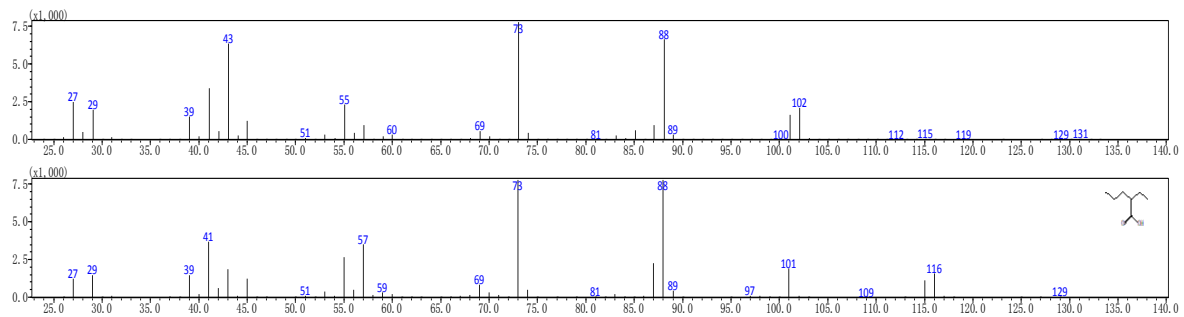

**Peak 2**

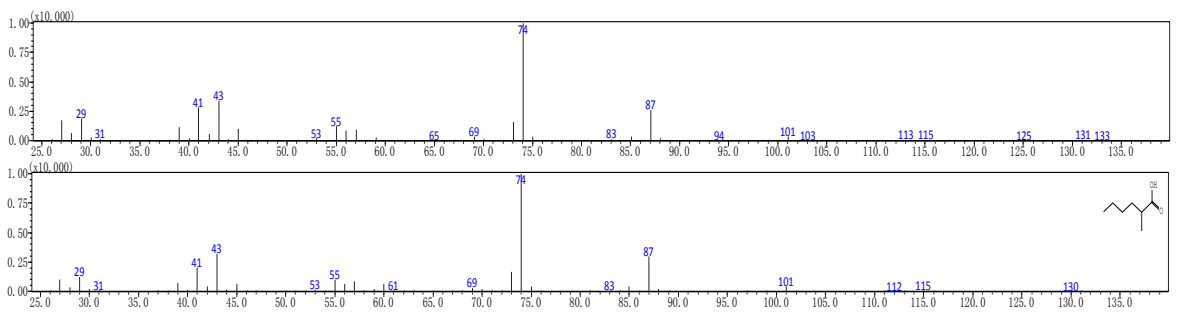

**Peak 3**

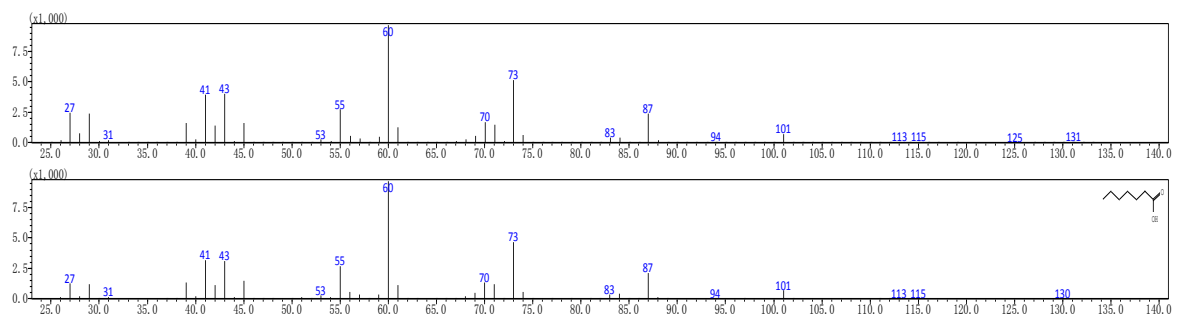

**Fig. S21** The GC-MS graph of the liquid sample using 1-hexylalcohol as substrate.

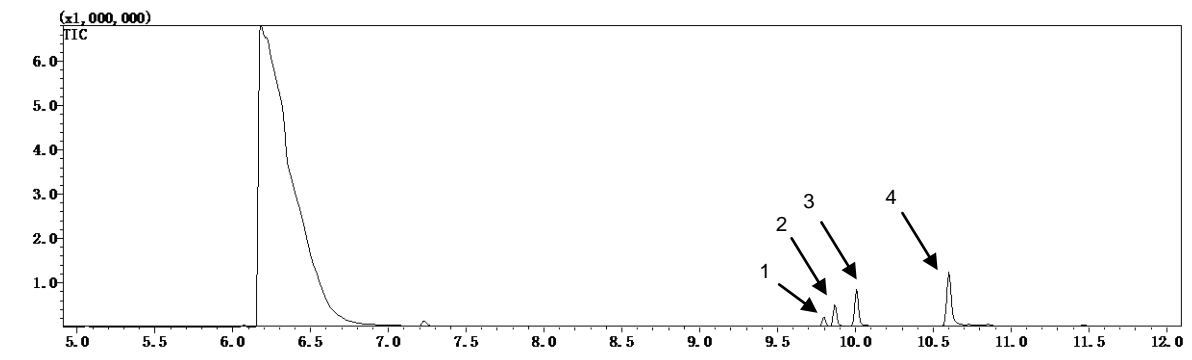

Peak 1

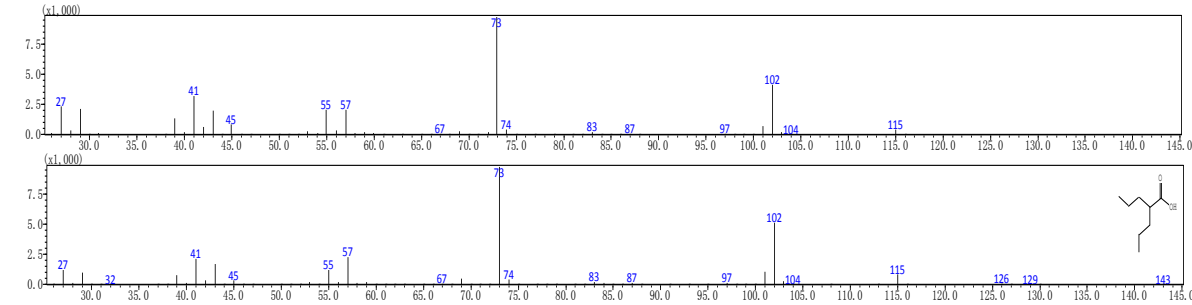

Peak 2

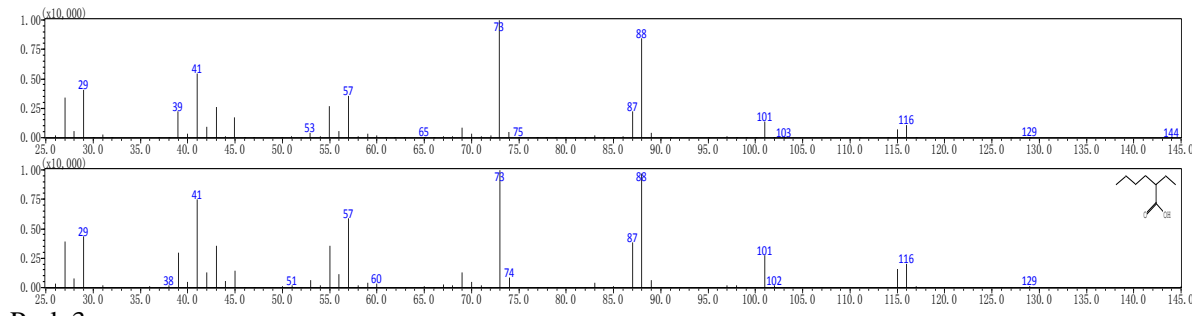

Peak 3

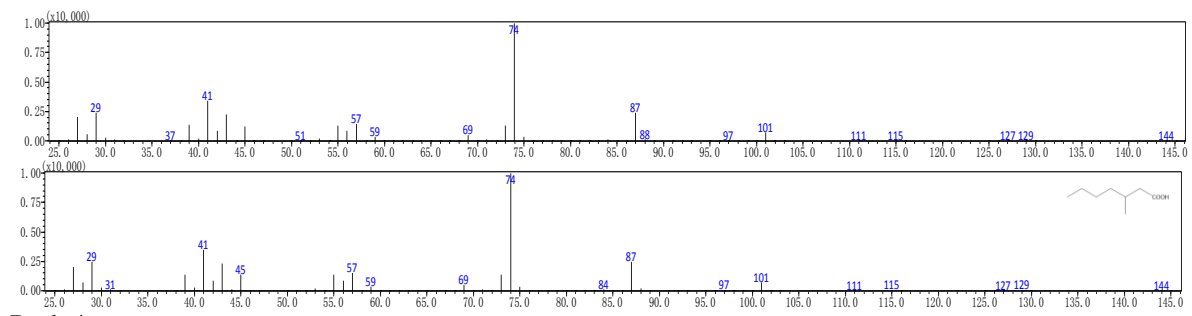

Peak 4

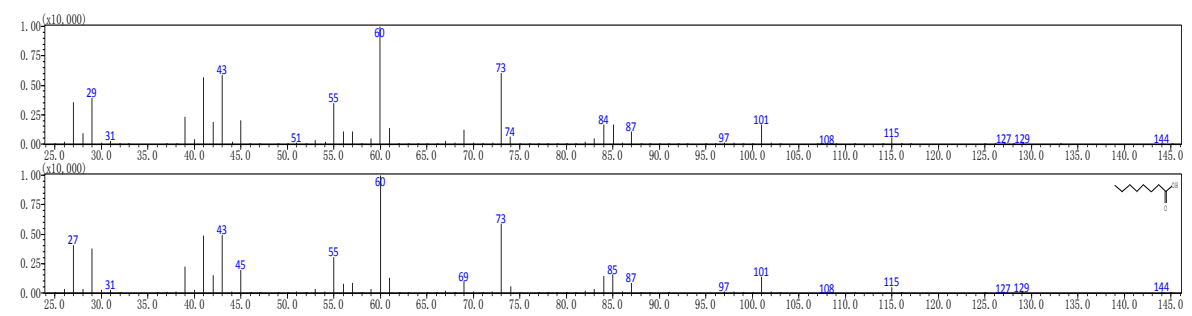

Fig. S22 The GC-MS graph of the liquid sample using 1-heptanol as substrate.

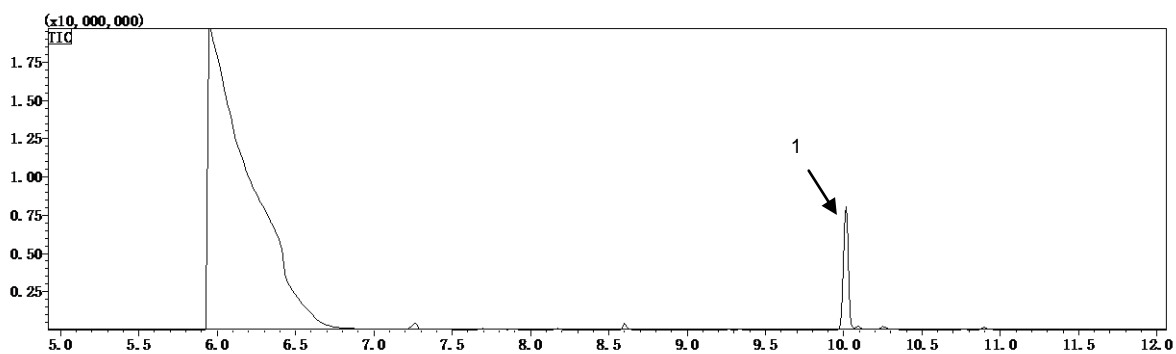

Peak 1

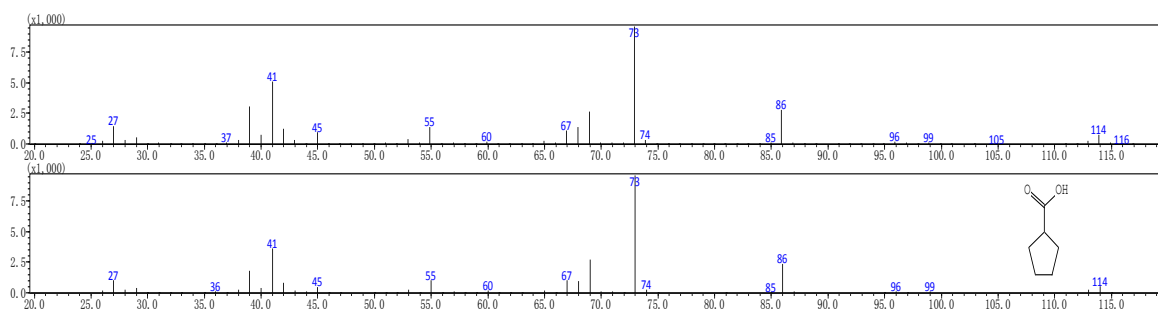

Fig. S23 The GC-MS graph of the liquid sample using cyclopentanol as substrate.



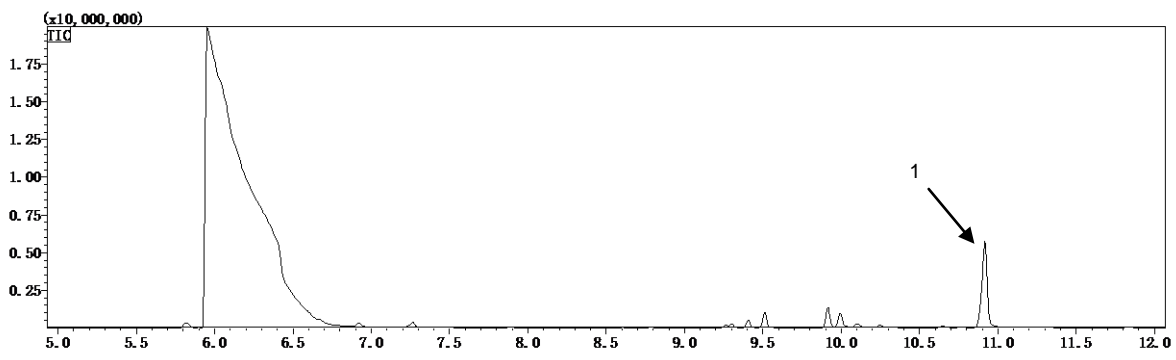

Peak 1

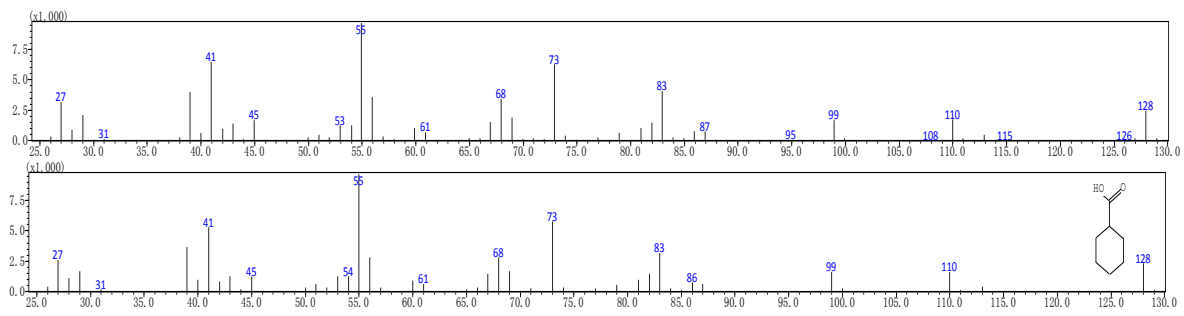

Fig. S24 The GC-MS graph of the liquid sample using 1,2-cyclohexanediol as substrate.

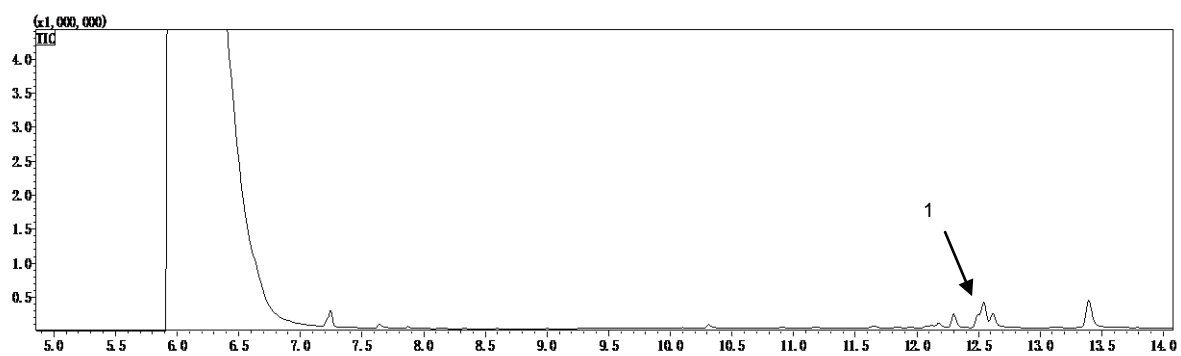

Peak 1

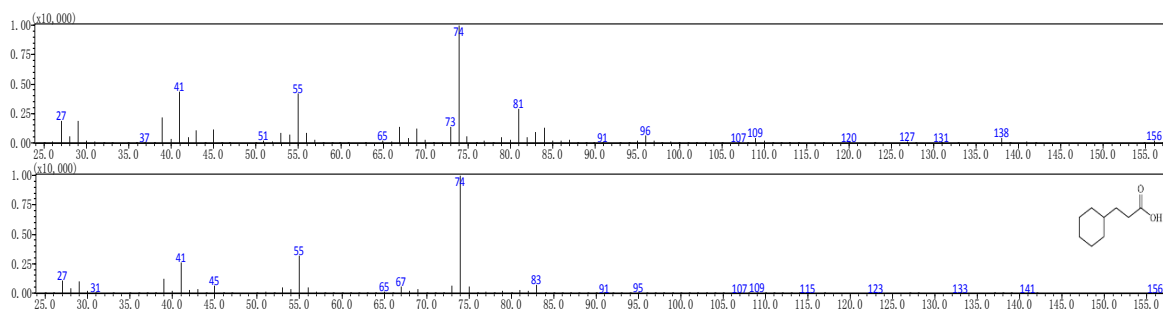

Fig. S25 The GC-MS graph of the liquid sample using 2-cyclohexylethanol as substrate.

## Tables

**Table S1** The price of different alcohol substrates and corresponding products.

| Entry | Substrates                           | Products                                                                       |
|-------|--------------------------------------|--------------------------------------------------------------------------------|
| 1     | cyclohexanol, ¥1.60/L (Aladdin)      | cyclohexanecarboxylic acid, ¥514.00/Kg (Aladdin)                               |
| 2     | ethanol, ¥27.96/L (Aladdin)          | propanoic acid, ¥99.20/L (Aladdin)                                             |
| 3     | 1-propanol, ¥56.90/L (Aladdin)       | butyric acid, ¥456.61 /L (Aldrich)<br>iso-butyric acid, ¥1337.46 /L (Aldrich)  |
| 4     | isopropanol, ¥39.96/L (Aladdin)      |                                                                                |
| 5     | glycerol, ¥63.50/L (Aladdin)         |                                                                                |
| 6     | 1-butanol, ¥31.96/L (Aladdin)        | valeric acid, ¥204.4/L (Aladdin)<br>2-methylbutanoic acid, ¥674.00/L (Aladdin) |
| 7     | sec-butanol, ¥100.50/L (Aladdin)     |                                                                                |
| 8     | tert-butanol, ¥86.40/L (Aladdin)     |                                                                                |
| 9     | 1,4-butanediol, ¥109.95/Kg (Aladdin) |                                                                                |
| 10    | 1,3-butanediol, ¥137.90/Kg (Aladdin) |                                                                                |
| 11    | 1-pentanol, ¥142.00/Kg (Aladdin)     | hexanoic acid, ¥1103.29/Kg (Aldrich)                                           |
|       |                                      | 2-methylpentanoic acid, ¥1570.00/Kg (Aladdin)                                  |
|       |                                      | 2-ethylbutyric acid, ¥784.00/L (Aladdin)                                       |
| 12    | 1-hexanol, ¥139.80/Kg (Aladdin)      | heptanoic acid, ¥336.84/Kg (Aldrich)                                           |
|       |                                      | 2-methylhexanoic acid, ¥12990.00/L (Aladdin)                                   |
|       |                                      | 2-ethylpentanoic acid, ¥6336000.00/Kg (Matrix)                                 |
| 13    | 1-heptanol, ¥308.00/L (Aladdin)      | octanoic acid, ¥295.09/L (Aldrich)                                             |
|       |                                      | 2-methylheptanoic acid, ¥11900.00/Kg (Aladdin)                                 |
|       |                                      | 2-ethylhexanoic acid, ¥110.09/L (Aladdin)                                      |
|       |                                      | 2-propylvaleric acid, ¥1604.00/L (Aladdin)                                     |
| 14    | cyclopentanol, ¥699.90/L (Aladdin)   | cyclopentanecarboxylic acid, ¥7940.00/Kg (Aladdin)                             |

The above price information was obtained from <https://www.inno-chem.com.cn/> in March, 2021.

**Table S2** Reaction results of cyclohexanol, CO<sub>2</sub> and H<sub>2</sub> with other metal complexes as catalyst

| Entry | Catalyst                                             | Promoter | Solvent | Yield <sup>b</sup> |
|-------|------------------------------------------------------|----------|---------|--------------------|
| 1     | RuI <sub>3</sub>                                     | LiI      | AcOH    | 0                  |
| 2     | RhI <sub>3</sub>                                     | LiI      | AcOH    | 1.3                |
| 3     | Palladium (II) acetate                               | LiI      | AcOH    | 1.4                |
| 4     | FeI <sub>2</sub>                                     | LiI      | AcOH    | <1                 |
| 5     | Co <sub>2</sub> (CO) <sub>8</sub>                    | LiI      | AcOH    | <1                 |
| 6     | H <sub>2</sub> OsBr <sub>6</sub> · xH <sub>2</sub> O | LiI      | AcOH    | 0                  |

Other conditions were the same as those in Table 1.

**Table S3** Effect of reaction parameters on the hydrocarboxylation of cyclohexanol with CO<sub>2</sub> and H<sub>2</sub>.

| Entry | Iridium(III) acetate<br>[ $\mu\text{mol}$ ] | LiI [mmol] | CO <sub>2</sub> /H <sub>2</sub> [MPa] | Yield [%] |
|-------|---------------------------------------------|------------|---------------------------------------|-----------|
| 1     | 45                                          | 2          | 6/1                                   | 65.2      |
| 2     | 25                                          | 2          | 6/1                                   | 55.8      |
| 3     | 65                                          | 2          | 6/1                                   | 64.0      |
| 4     | 45                                          | 1          | 6/1                                   | 53.5      |
| 5     | 45                                          | 3          | 6/1                                   | 52.8      |
| 6     | 45                                          | 4          | 6/1                                   | 33.5      |
| 7     | 45                                          | 2          | 3/0.5                                 | 15.7      |
| 8     | 45                                          | 2          | 6.5/0.5                               | 60.2      |
| 9     | 45                                          | 2          | 5/2                                   | 57.6      |
| 10    | 45                                          | 2          | 4/3                                   | 37.4      |
| 11    | 45                                          | 2          | 3/4                                   | 19.8      |
| 12    | 45                                          | 2          | 2/5                                   | 8.5       |
| 13    | 45                                          | 2          | 1/6                                   | 5.1       |
| 14    | 45                                          | 2          | 0/1                                   | 0         |
| 15    | 45                                          | 2          | 6/0                                   | 2.4       |

Reaction conditions: iridium(III) acetate (based on Ir) was used as catalyst precursor, LiI was used as promoter, 0.5 mL AcOH, 2.25 mmol cyclohexanol, 170 °C, 16 h.

**Table S4** Catalytic results with CO as reactant gas.

| Entry | CO [MPa] | H <sub>2</sub> [MPa] | Yield [%] |
|-------|----------|----------------------|-----------|
| 1     | 0.5      | 0                    | 84.6      |
| 2     | 1        | 0                    | 79.2      |
| 3     | 2        | 0                    | 55.7      |
| 4     | 3        | 0                    | 49.1      |

Reaction conditions: 45  $\mu$ mol iridium(III) acetate (based on Ir), 2 mmol LiI and 0.5 mL AcOH, 2.25 mmol cyclohexanol, 16 h, 170 °C.

**Table S5** Catalytic results of the reactions between CO and the derivatives from cyclohexanol.<sup>a</sup>

| Entry            | Substrate                                                                          | Catalyst                   | Yield [%] |
|------------------|------------------------------------------------------------------------------------|----------------------------|-----------|
| 1                |   | Iridium(III) acetate + LiI | 37.6      |
| 2 <sup>b</sup>   |                                                                                    | Iridium(III) acetate + LiI | 83.5      |
| 3 <sup>c</sup>   |                                                                                    | Iridium(III) acetate       | 0         |
| 4 <sup>b,c</sup> |                                                                                    | Iridium(III) acetate       | 0         |
| 5                |   | Iridium(III) acetate + LiI | 59.3      |
| 6 <sup>b</sup>   |                                                                                    | Iridium(III) acetate + LiI | 82.0      |
| 7 <sup>c</sup>   |                                                                                    | Iridium(III) acetate       | 0         |
| 8 <sup>b,c</sup> |                                                                                    | Iridium(III) acetate       | 0         |
| 9                |  | Iridium(III) acetate + LiI | 13.3      |
| 10 <sup>b</sup>  |                                                                                    | Iridium(III) acetate + LiI | 61.4      |
| 11               |                                                                                    | Iridium(III) acetate       | 39.3      |
| 12 <sup>b</sup>  |                                                                                    | Iridium(III) acetate       | 89.6      |

<sup>a</sup> Reaction conditions: 45  $\mu\text{mol}$  iridium(III) acetate (based on Ir), 2 mmol LiI (if used), 0.5 mL AcOH, 0.5 mmol substrate, 1 MPa CO (at room temperature), 170  $^{\circ}\text{C}$ , 10 h.

<sup>b</sup> 100  $\mu\text{L}$  water was added before the reaction.

<sup>c</sup> Gray/black fine powder was observed after the reaction, suggesting that the catalyst was unstable.

**Table S6** Catalytic results with different intermediates as substrate to react with CO<sub>2</sub> and H<sub>2</sub>.

| Entry | Substrate                                                                         | Yield [%] |
|-------|-----------------------------------------------------------------------------------|-----------|
| 1     |  | 56.1      |
| 2     |  | 59.7      |
| 3     |  | 0.5       |

Reaction conditions: 45  $\mu$ mol iridium(III) acetate (based on Ir), 2 mmol LiI and 0.5 mL AcOH, 2.25 mmol substrate, 6.0 MPa (68 mmol) CO<sub>2</sub> and 1 MPa H<sub>2</sub> (at room temperature), 170 °C, 16 h.



## Supplementary References

1. A. Haynes, P. M. Maitlis and G. E. Morris, *J. Am. Chem. Soc.*, 2004, **126**, 2847-2861.
